# Supplementary material for: Correction of wind bias for the lidar on-board Aeolus using telescope temperatures
Source: Copernicus journal article supplement (doi:10.5194/amt-2021-171), 2021-06-23
Supplement: Supplementary file [file amt-2021-171-AC1-supplement.pdf]

## Response to Referee Comment #1 on

### *Correction of wind bias for the lidar on-board Aeolus using telescope temperatures*

The authors thank reviewer #1 for carefully reading the paper and providing very useful comments. In the following, referee comments are repeated in green and answers by the authors are provided directly below in black.

#### General comments:

The manuscript is well structured and addresses an important issue, i.e. systematic error, in the view of improving the impact of Aeolus HLOS winds in NWP. With this it is found as an important contribution to the Aeolus special edition and is as well in the scope of the AMT. The methods applied are well designed. Especially, apart from the very positive response of the bias correction methods presented, the potential weaknesses are discussed as well. Such is the usage of NWP winds, which inherently are biased. The addition of the ZWC based bias correction method is very appreciated in that regard. I don't have any major comments, although, below I list some minor questions and suggestions.

#### Specific comments:

I have a question regarding the usage of O-B for computation of bias correction factors. I cannot find in the manuscript if any quality control of O-B is provided before usage in the MLR method. Not all HLOS observations are valid, and also some might not be inconsistent with the model, which can affect the bias correction methodology. So, my question: could you add what kind of QC is done before using O-B in MLR? For example, it could be added in line 215.

For the calculation of the regression coefficients only valid L2B wind results, with product confidence flag set to true, are used. The Aeolus L2B products also contain HLOS error estimates for each wind result which are based on noise propagation from the signal-to-noise ratio of the useful signals. Maximum thresholds of 4 m/s and 8 m/s are used for the Mie and Rayleigh channel, respectively, following recommendations from ECMWF. This information was added to the text:

220 from June 2019 to December 2019 also includes this improvement.

For the following analysis of the dependency of the wind bias on the M1 temperatures, a representative average O-B value " $E(O - B)$ " is calculated from the L2B O-B values. For this only L2B wind results with the overall validity flag set to true are used. In addition, HLOS error estimates, reported for each L2B wind result, are used as quality criterion. Only Mie and Rayleigh wind results with HLOS error estimates smaller than 4 m/s and 8 m/s, respectively, are considered. As mentioned

225 above, the O-B values are available for each L2B wind result. However, to decrease the variance of the bias, the O-B values

In Line 225 you justify the usage of model as a reference for computation of bias correction factors. In particular you compare the model with radiosondes. This is of course meaningful only where radiosondes are present. It is more difficult to justify that over tropics, South hemisphere or even over oceans. These are exactly locations where we would like learn more from Aeolus. Maybe it would be valuable to mention this issue in the discussion section or conclusions?

You are correct. The comparison is restricted to regions where radiosondes and pilots are available. Figure 1 and 2 below show the coverage of radiosondes and pilots used for the comparison. It shows that the comparison is mainly restricted to land areas in the northern hemisphere, although there also

some measurements available in tropical regions (see Figure 2 around Indonesia). This point was added to Sec. 2.4 of the manuscript:

235 It is obvious that the use of the NWP model for the bias correction introduces some NWP model bias dependency, since the  
ECMWF model wind biases are not zero. However, this is justified by the fact that on average the global bias of the model  
wind u-components w.r.t reference measurements based on radiosondes is relatively small. This is demonstrated in Figure 4  
which shows the time series of daily averages of E(O-B) values of the ECMWF's u-component winds computed for  
radiosondes and pilots (radiosondes that only measure wind). It should be mentioned that the comparison is restricted to  
240 locations where radiosondes and pilots are available, which is mainly above northern hemisphere land surface. Thus, it is  
difficult to accurately assess the model bias in the southern hemisphere or above oceans. Nevertheless, Figure 4 shows that  
dDuring all days the bias is clearly below 0.3 m/s, which is significantly smaller than the Aeolus M1 related bias (for the  
Rayleigh), justifying the choice of the ECMWF model as a reference for the bias correction.

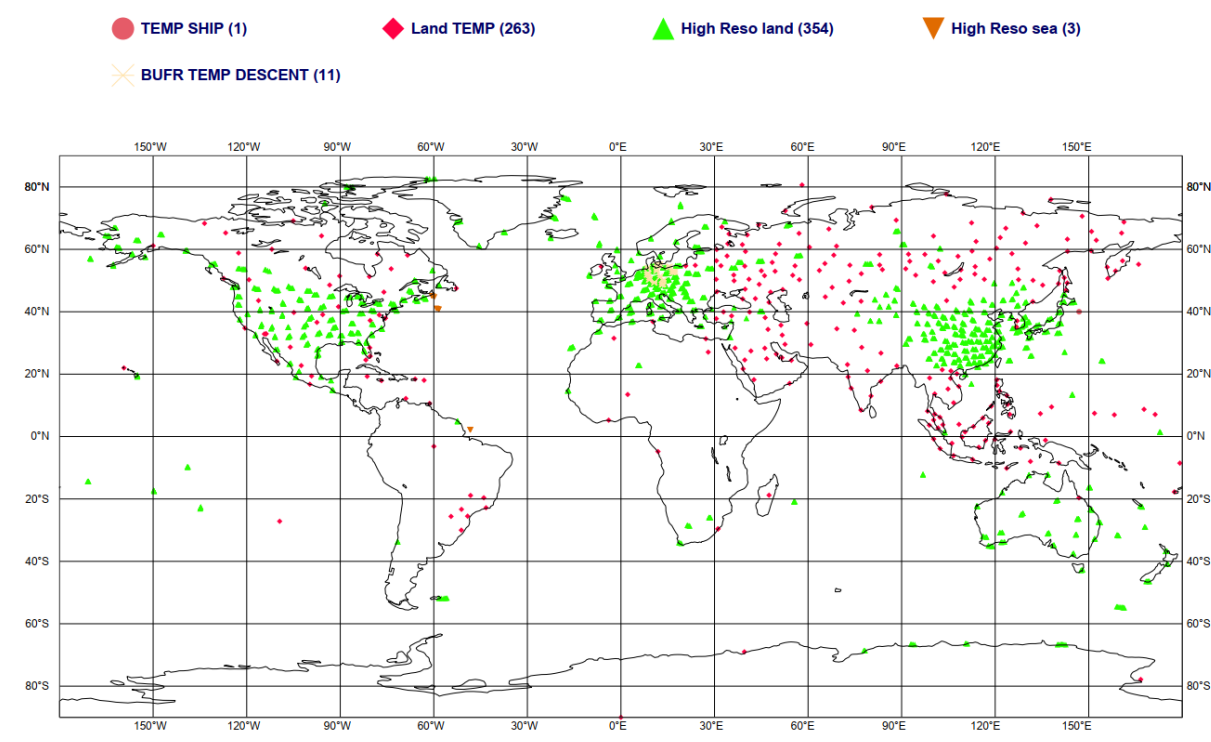

Figure 1: ECMWF data coverage of radiosondes for April 28, 2021.

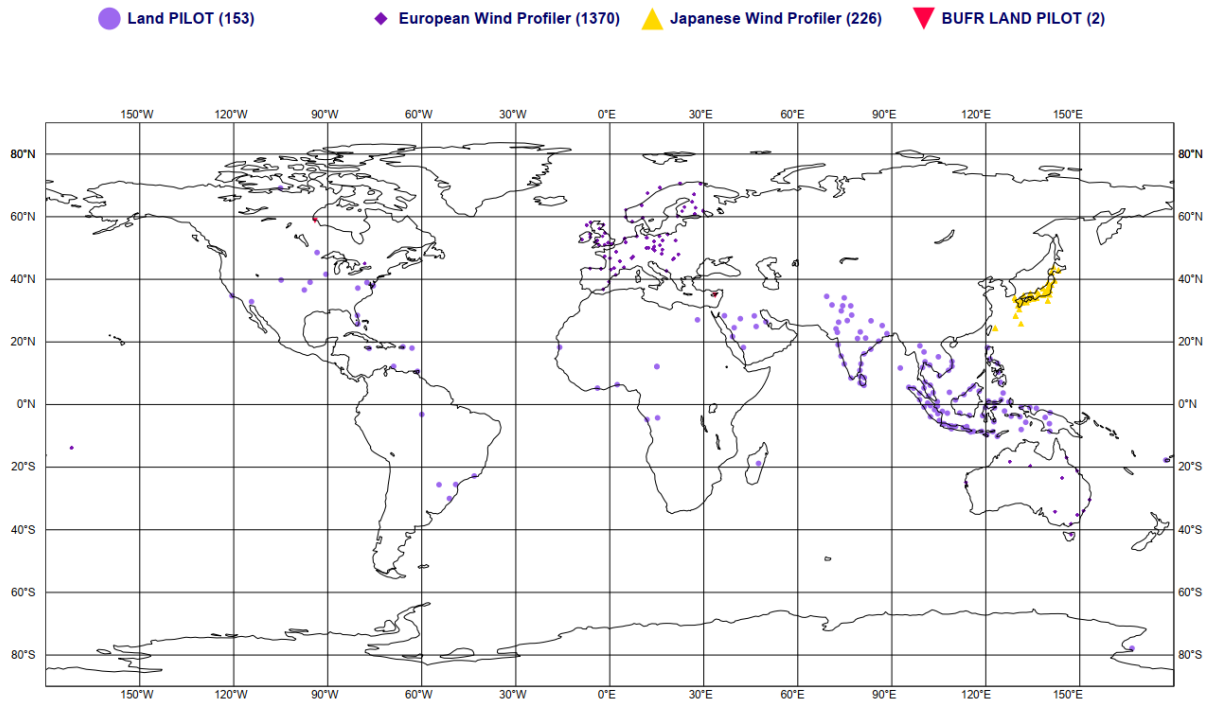

Figure 2: ECMWF data coverage for pilots (radiosondes that only measure wind) and wind profilers for April 28, 2021.

However, it should be mentioned that the bias of GNSS radio occultation profiles, which are distributed globally and are not bias corrected, is very low. These measurements act as anchor measurements for the whole data assimilation system. They may be measuring vertical profiles of mass information, however through 4D-Var this provides a strong constraint on the wind field. Also, there are globally distributed microwave radiances that are sensitive to humidity information, which again through 4D-Var leads to a strong constraint on the wind field. So, I would not expect wind biases to be that much worse away from radiosonde sites. The only exception is in the tropics e.g. in the UTLS near the ITCZ. There, biases between different operational NWP analyses can be quite large (see Figure 7, page 25 in <https://www.ecmwf.int/en/elibrary/18014-advanced-monitoring-aeolus-winds>).

Bias correction factors (AUX\_TEL\_12) are computed every 12h. How degraded is the bias estimate if estimated from data 12h in the past, i.e. how degraded is the bias correction estimate at the last 12h of this window? If you maybe estimated this? Line 382

The reason for the high update frequency is twofold. On the one hand, the instrument's sensitivity towards telescope temperature variations slowly changes with time. This manifests as a slow change of the model coefficients over time, showing the need for regular updates. On the other hand, it is necessary to capture the global bias drift induced by the drift of the internal reference of the instrument. This drift happens on shorter timescales than the first effect and has larger impact on the overall performance of the bias correction. It mainly affects the performance in reducing the average offset w.r.t to the ECMWF model.

The bottom plot of Figure 13 of the manuscript shows the performance of the correction for 24h updates. In this case, the average offset is always below 1 m/s HLOS. In operations, an update frequency of 12 h is used which further improves this result. The performance depends on the change of the internal reference response in a 12h interval. To quantify this effect for the analysed period, the change rate of the Rayleigh HLOS bias (blue curve in the bottom plot of Figure 13 in the manuscript) is calculated. First, a rolling mean of the Rayleigh HLOS bias with a window size of 24 hours is calculated,

corresponding to the 24h of data used for the regression. Next, binned averages using a duration of 12h are calculated and the difference of adjacent bins is analysed. On average, the difference, i.e. the remaining bias after the bias correction, is very small with 0.09 m/s. The maximum value (worst case) is 0.78 m/s which is still well within the systematic error requirements. This information was added to the manuscript:

is changing over time. Moreover, this allows to capture the slowly drifting global average bias. Investigations have shown that the global average bias changes are due to a slow drift of illumination of the Rayleigh spectrometers in the internal path (particularly for the FM-B laser). In order to capture this effect, it was decided to implement an intercept term  $\beta_0$  (see Eq. 1) into the model which makes sure that mean of the model residuals, i.e. the  $Mean[E(O - B)]$  value of the analyzed period, is zero. To avoid large constant bias offsets from the model, the mean winds are anchored to the ECMWF model twice per day and the AUX\_TEL\_12 generation is updated every 12 hours. The introduced bias offset depends on the change rate of the internal reference response in the 12h interval. For the analyzed period, the maximum change (worst case) was considerably small with 0.78 m/s. To make sure that the sample size is large enough and the fit coefficients are derived with a sufficiently high enough accuracy, 24 hours of past data (~6500 samples) is used in the MLR.

Due to unexpected bias jumps related to signal jumps in the Rayleigh internal reference, the internal reference is not used anymore in the operational wind processing from 14<sup>th</sup> December 2020 onwards (time period not covered in the manuscript). Instead, the internal Rayleigh response has been fixed to a constant value which is possible as the M1 bias correction takes care of drifts linked to the atmospheric path of the instrument which would have been corrected by the internal reference. So, the high update frequency is also important to quickly correct for unexpected bias jumps associated with the atmospheric path of the instrument.

In the Summary section I suggest to provide explanations for abbreviations again (i.e. for MLR, ZWC, ...). Since many readers will first read conclusions.

Agreed – the summary was changed.

How fast is the reaction of heaters in M1 mirror, compared to the satellite ground speed? How this delay effects the bias correction factors?

The thermistors are mounted on the rear side of the telescope. Thus, the reaction of the thermistors to environmental changes is limited by the conductive coupling through the M1 mirror thickness. In addition, the calculation of the heater duty cycle of each heating line for the thermal control loop is based on thermistor measurements is performed only every second. So, there is some delay. However, it is difficult to assess how this delay compares to the satellite ground speed. But looking at Figure 7 (top) of the manuscript, gives a hint about the reaction time of the thermistors. Based on the latitudinal displacement of the cold clouds of the ITCZ visible for ascending and descending orbits, it seems that there is a delay of a few 1000 km corresponding to a delay of a few minutes. More importantly, the bias correction is not affected by this delay as it is based on the actual M1 temperatures and not the corresponding TOA flux from the atmosphere.

How far (in days for example) in the future can bias correction still be used, if estimated by regression today?

The figure below compares the approaches of using fixed model coefficients with updating the model every 24 hours. The red curve indicates the performance using a fixed set of regression coefficients, obtained on day 1 of the analysed period, for the complete period. Due to the internal reference drift

the mean bias continuously increases (bottom plot) from close to 0 m/s at the beginning of the period to 10 m/s at the end of the period. The daily averages of the standard deviation of the Rayleigh bias of both approaches are comparable at the beginning of the period. However, approximately after month the performance of the model with fixed coefficients begins to degrade, showing the necessity of regular updates.

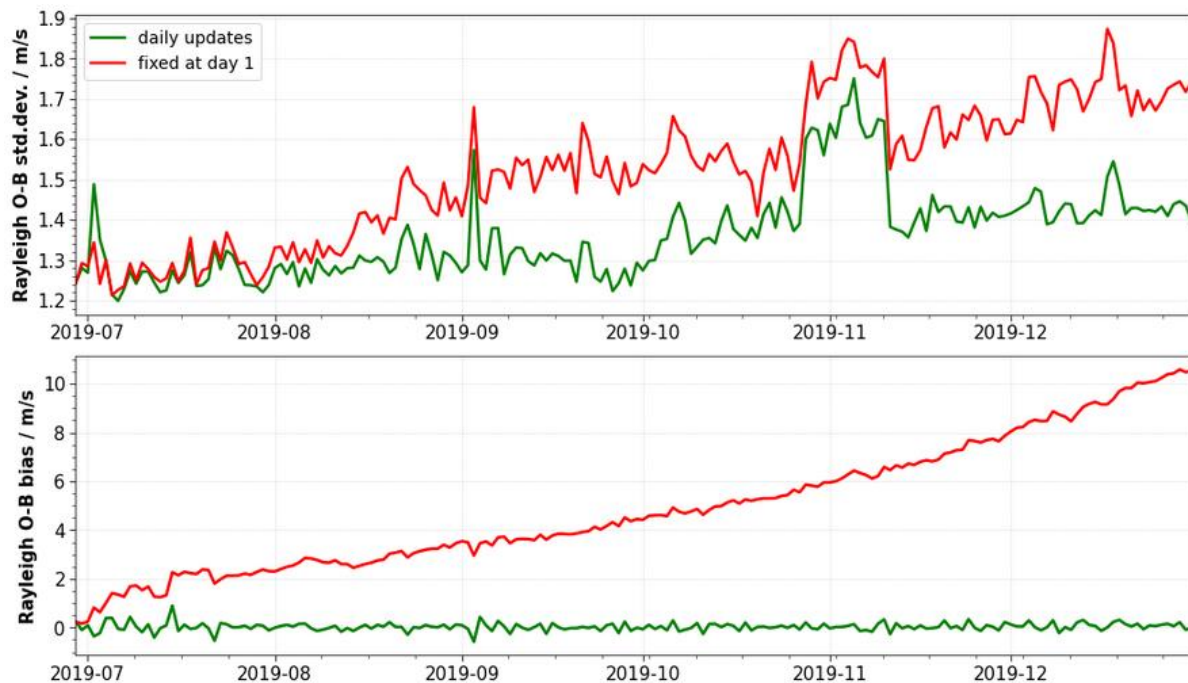

Figure 3: Time series of daily averages (15 orbits) of the standard deviation (std. dev.) (top) and the bias (bottom) of the Rayleigh clear E(O-B) HLOS values after the O-B based M1 correction based. For the green curve data from day  $N$  is used to predict the bias on day  $N+1$ . The red curve is based on a fixed prediction model derived on day 1 (June 28).

### Technical corrections:

We would like to thank the reviewer for this thorough review and the large number of technical corrections, which significantly improved the manuscript.

Line 13/14: “at a global scale” could be replaced with “globally from space”. In addition, in Line 14, “into space” could be removed

This was corrected in the manuscript.

Line 17: It reads a bit confusing. Is "small" related to temperatures or fluctuations?

The sentence was rephrased.

Line 21: The “short- wave radiation” is probably meant as a reflection of the sun shortwave radiation, not earth?

Yes, this is correct. The sentence was rephrased.

Line 22: “response” could be replaced with “related response”, it reads better. In this regard the “to that” in Line 22 could be removed.

The sentence was changed accordingly.

Line 23: “as bias reference” is a bit confusing, I would suggest replacing it with “as a reference to describe ...”

The sentence was changed accordingly.

Line 28: “However” is not appropriate. I would suggest replacing it with “Furthermore”

Yes, this is correct. The sentence was changed.

Line 29: “as” → “as a”

This was changed.

Line 30: “has” → “has a”

This was changed.

Line 47: I suggest to replace the order a bit: “The operational ... was started on 9 January 2020, followed by ...”

The order of the sentence was changed accordingly.

Line 53: “This issue could ...” should probably be: “This issue was successfully mitigated on ...”

This was changed.

Line 55: “unexpectedly large systematic error” maybe it would be valuable to explain that this is independent of the first source of error explained in the previous lines?

Yes, this is independent of the hot pixel issue. This was clarified in the text.

Line 85: Maybe it should be explained what is “terminator”? People from NWP (who are certainly interested in this study) may not be familiar with this term.

The terminator is the line dividing the Earth into sunlit and night-time areas. This information was added to the manuscript.

Line 99: I suggest splitting the sentence in two smaller sentences. “Thus ...determined. Afterwards, a projection ...”

Agreed. This was changed.

Line 99: “... plane the horizontal ...” could be replaced with “... plane, the so-called horizontal ...”

This was changed.

Line 107: I suggest removing this sentence. It provides an additional complexity not needed anywhere in the manuscript.

It was decided to keep this information in the manuscript since the on-chip accumulation of charges to so-called “measurements” is a very important aspect in the processing chain.

Line 115: “and the wave front error” it reads as that telescope is made of wave front error? I don't understand.

It was split into two sentences.

Line 116: “the integration” what do you mean, what kind of integration?

The wave front error was determined after the final assembly of the instrument. This was clarified in the text.

Line 117: “specification” what does this specification mean? How does this affect the wind retrieval on Aeolus?

The WFE of the telescope determines the divergence of the transmitted laser beam in the atmosphere together with the laser divergence at the output of the laser. This divergence of the transmitted beam determines the footprint of the laser, and thus the signal budget together with the field-of-view of the telescope. Thus, it is a relevant contributor to the random error, in case that the transmitted laser beam is larger than the FOV.

Line 125: “for each observations”, what do you mean with observations?

The observation granularity is introduced in Section 2.1 of the manuscript (line 110). 30 measurements are accumulated to one observation with a duration of 12s.

Line 126: “TC-TC-23” → “TC-23”

This was changed.

Line 130: “the distance”, but also the angle of the M2 in respect to M1 can be changed?

No, it is not possible to change the angles between both mirrors by the implemented equal heating for the struts.

Caption: Figure 1. There should be a date/time of the last access present with the url.

Information about the last access was added to the figure caption.

Line 145: The Table 1 is not referenced anywhere in the text (I cannot find it)? Also, since all of these are already described in the text, I don't see the need for adding a table.

A reference to the table was added in the text.

Line 151: “fast cycle”, what exactly is this cycle?

This is indeed misleading. The part of the sentence with “fast cycle” was removed.

Line 159: maybe to replace “...” with “etc.”?

This was changed.

Line 165: “as” → “as a”

This was changed.



Line 179: "9700 ...", In line 174 it is stated that thresholds are set to 0. I don't understand how the 9700 LSB is associated with that thresholds? It should be better explained.

In the operational processing of ground return winds, the thresholds for the minimum ground useful signal are set to 0. Thus, a large number of ground returns, possibly also low-quality data, is reported in the L1B products. But as the ground useful signal is reported as well in the product, it is possible to apply dedicated quality control to the ground return winds before doing further analysis. In this case, a minimum useful signal threshold of 9700 LSB is applied to the Rayleigh ground returns, ensuring the removal of gross outliers from the dataset. The paragraph in the text was rephrased accordingly.

Line 196: "... of better quality", here I would suggest to add in addition, that "Mie-clear" winds are physically not really meaningful. These are mainly a result of the classification methodology.

Yes, this is correct. This information was added to the text.

Line 205: "Tco1279": maybe it would be valuable to add the meaning of this, i.e. cubic-octahedral spectral transform with spectral truncation of  $n=1279$  (<https://www.ecmwf.int/sites/default/files/elibrary/2016/17262-new-grid-ifs.pdf>). Since many readers of this paper might not be from NWP.

This information was added to the text.

Line 206: "0 h and 12 h": Isn't this up to 30 h, for situations when AUX\_MET is missing (I think this information is present in L2B ATBD)?

The AUX\_MET is produced every 12 hours and contains a forecast range up to 30 hours (0 to 30 hours). The above "usually in the forecast range 0 h and 12 h" is perhaps a bit confusing. It was trying to emphasise that the forecast data (which we call B) applied in the L2B product O-B statistics are usually short-range forecasts i.e. in the range 0-12 hours i.e. we are not using longer forecast ranges e.g. 20-30 hours, due to the twice per day update of the files - and an only 3-hour delay on delivery of the AUX\_MET file in operational processing relative to the validity start of the file. The shorter the forecast range the more accurate the forecast since the errors grow exponentially. The paragraph was rephrased.

Line 207: "interpolated", it is valuable to add the kind of interpolation.

It's a nearest neighbour interpolation. This information was added.

Line 206: "The nearest neighbour": is this regarding the last sentence?

Yes, this is the explanation of the interpolation.

Line 209: Regarding the sentence "These differences ... at a global scale". Here a reference on <https://amt.copernicus.org/articles/14/2167/2021/> might be add, since there this is already thoroughly discussed.

Thank you very much for pointing us to this reference, which was added here.

Line 211: "... assimilation ..." → "... data assimilation ..."

The sentence is correct. It's already "... data assimilation ...".



Line 217: How exactly is this averaging done. Is this meant for Mie, since for Rayleigh the maximal accumulation is already 86.4 km? For Rayleigh accumulation length of observations can be of course smaller than 86.4 km, but I don't understand how can you average this back on the 86.4 km? Is this like some kind of interpolation along the track every 86.4 km?

For the Rayleigh channel the maximum accumulation length is 86.4 km which corresponds to the length of one L1B observation. However, also shorter accumulation lengths can occur. I agree that for cases with accumulation lengths close to 86.4 km, it's more like a selection of Rayleigh wind results rather than an averaging. This is clarified in the text.

Line 230: "as" → "as a"

This was changed.

Figure 3: It would be more natural to invert x and y axes, so that altitude is on y axes. If possible? As well, is this before or after the quality control?

The axes were inverted. It's only showing wind results after the quality control described above in the specific comments section. This information is added to the figure caption.

Figure 4: Is this globally? Meaning everywhere where radiosondes are present?

Yes, this is globally. The location of the radiosondes and pilots is in the plots above.

Line 241: "as" → "as a"

This was changed.

Line 248: "as" → "as a"

This was changed.

Line 253: I think there is one space too much in "360"

You are correct. This was changed.

Line 272: "HISR" → "HIRS"

Thank you. This was changed.

Line 365: "This is shown ...." Is this consistent when repeated on other days?

Yes, the shape of the residual curve is comparable with other days.

Line 372: "... from to 2.89 m/s ..." → "...from 2.89 m/s ..."

This was changed.

Line 384: "As next step ..." → "As a next step ..."

This was changed.

Line 394: "To avoid large ..." Is this part of the scheme presented in Figure 10 or is done separately? Maybe to clarify this here.

This is part of the scheme presented in Figure 10. Further clarification was added to the text.

Figure 9. In caption. "... dots indicates ..." → "...dots indicate ..."

This was changed.

Line 426: I suggest to remove "potential"

Agreed.

Line 429: "as" → "as a"

This was changed.

Line 436: "as" → "as a"

This was changed.

Line 440: The offset of 3 m/s. Is this consistent in time? How can this be removed, if it is not consistent in time?

This offset is quite consistent with time and is considered to be a result of the different calibration schemes used to process L2B wind results (AUX\_RBC) and L1B ZWC winds (AUX\_RRC). Information about the consistency with time was added to the text.

Line 458: "confirm" → "to confirm"

This was changed.

Figure 11: caption. "... winds (green) and without ..." → "... winds (green) without ...". As well "as" → "as a".

This was changed.

Line 468: What do you mean "... with different temperature set point conditions ..."? What are set point conditions?

The thermal control of the telescope aims at keeping the telescope temperatures at a fixed temperature set point. This is explained in Section 2.2 of the manuscript. For the tests the set point was changed to test the influence on the radiometric performance of the instrument.

Line 476: What is "control law coefficients"? I don't understand.

The thermal control of the M1 mirror is based on a Proportional Integrational Differential (PID) control loop which controls the heating power applied to the TC sensors. To get the optimal response certain coefficients of the control algorithm can be varied. This information was added.

Line 496: "... series ..." → "... series, ..."

A semicolon was added.

Line 496: "The top plot shows the standard deviation ...". Here I suggest to mention that this standard deviation is now statistics of daily averages.

This information was added to the text.

Line 497: "... before and the after ..." → "... before and after ..."

This was changed.

Line 507: "... with more smaller ..." → "...with smaller ..."

This was changed.

Line 536: "as" → "as a"

This was changed.

Line 540: "reduced" → "reduces"?

This was changed.

Line 555: "... and ZWC (green) ..." this can be removed, since it is explained in the first sentence of the caption.

This was changed.

Line 568: "of" → "of about"

This was changed.

Line 572: "... over the seasons ..." → "... over seasons ..."

This was changed.

Line 585: "STD(E(O-B))-value" probably there is some spaces missing here?

No, this seems to be correct.

Line 587: Like above, it is not clear what the law coefficients stands for?

See comment above. An explanation was added to Sec. 4.1 of the manuscript.

Lines 590-560: many cases of "as" → "as a"

This was changed for multiple cases.

Line 623: Maybe to change CNRS to CNRS/Météo-France

Done.
